# Supplementary material for: When Pneumonia is One-Sided: A Rare Unilateral Progressive Pneumocystis jirovecii Pneumonia Case
Source: Research Square preprint supplement (doi:10.21203/rs.3.rs-8524345/v1), 2026-01-26
Supplement: Supplementary file 1 [file fbf6f3bd8ccbd4a71d217099.pdf]

I. Basic Information

Tested Individual Information

- Name: [Redacted]
- Gender: Male
- Date of Birth / Age: 60
- Hospital/Department: N/A
- Hospitalization No./Bed No.: N/A

Clinical Information

- CRP (mg/L): -
- PCT (µg/L): -
- WBC (×10<sup>9</sup>/L): -
- Lymphocytes: -
- Neutrophils: -
- Clinical Diagnosis: Infection to be investigated
- Medication History: -

Sample Information

- Analysis Method: Metagenomic
- Sample Type: Bronchoalveolar Lavage Fluid
- Sample ID: [Redacted]
- Collection Time: 2024-11-05 10:42
- Sample Receipt Time: 2024-11-05 11:20
- Report Time: 2024-11-06 09:39

Pathogen Detection Summary

| Pathogen Virulence <sup>1</sup> | Detected Pathogen        | Category | Sequence Count <sup>2</sup> | Relative Abundance <sup>3</sup> | Risk Level <sup>4</sup> |
|---------------------------------|--------------------------|----------|-----------------------------|---------------------------------|-------------------------|
| **Highly Pathogenic Pathogens** | -                        | -        | -                           | -                               | -                       |
| **Opportunistic Pathogens**     | *Pneumocystis jirovecii* | Fungus   | 12,379                      | 100.0000%                       | High                    |
|                                 | Human Cytomegalovirus    | Virus    | 139                         | 0.3354%                         | Moderate                |
|                                 | Human Herpesvirus 1      | Virus    | 96                          | 0.3569%                         | Moderate                |

Notes:

- <sup>1</sup> Pathogen virulence classification
- <sup>2</sup> Total number of sequenced reads
- <sup>3</sup> Proportion of reads relative to total microbial sequences
- <sup>4</sup> Risk level: High (severe threat), Moderate (potential threat)
